1 **Genome sequencing and detection of Philippine SARS-CoV-2 infections with viruses classified under**  
2 **the B.1.1.7 lineage**

3 Francis A. Tablizo<sup>1</sup>, Cynthia P. Saloma<sup>2,7\*</sup>, Marc Jerrone R. Castro<sup>1</sup>, Kenneth M. Kim<sup>1</sup>, Maria Sofia L.  
4 Yangzon<sup>1</sup>, Carlo M. Lapid<sup>1</sup>, Benedict A. Maralit<sup>3</sup>, Marc Edsel C. Ayes<sup>4</sup>, Jan Michael C. Yap<sup>1</sup>, Jo-Hannah S.  
5 Llames<sup>3</sup>, Shiela Mae M. Araiza<sup>3</sup>, Kris P. Punayan<sup>3</sup>, Irish Coleen A. Asin<sup>3</sup>, Candice Francheska B. Tambaonan<sup>3</sup>,  
6 Asia Louisa U. Chong<sup>3</sup>, Karol Sophia Agape R. Padilla<sup>3</sup>, Rianna Patricia S. Cruz<sup>1</sup>, El King D. Morado<sup>1</sup>, Joshua  
7 Gregor A. Dizon<sup>1</sup>, Eva Maria Cutiongco-de la Paz<sup>2,7</sup>, Alethea R. de Guzman<sup>5</sup>, Razel Nikka M. Hao<sup>6</sup>, Arianne  
8 A. Zamora<sup>5</sup>, Devon Ray Pacial<sup>5</sup>, Juan Antonio R. Magalang<sup>5</sup>, Marissa Alejandria<sup>7</sup>, Celia Carlos<sup>7</sup>, Anna Ong-  
9 Lim<sup>7</sup>, Edsel Maurice Salvaña<sup>7</sup>, John Q. Wong<sup>7</sup>, Jaime C. Montoya<sup>7</sup>, and Maria Rosario Singh-Vergeire<sup>7</sup>

10

11 \* To whom correspondence should be addressed. Email address: [cpsaloma@up.edu.ph](mailto:cpsaloma@up.edu.ph)

12

13 <sup>1</sup> Core Facility for Bioinformatics, Philippine Genome Center, University of the Philippines System

14 <sup>2</sup> Philippine Genome Center, University of the Philippines System

15 <sup>3</sup> DNA Sequencing Core Facility, Philippine Genome Center, University of the Philippines System

16 <sup>4</sup> Clinical Genomics Laboratory, Philippine Genome Center, University of the Philippines System

17 <sup>5</sup> Epidemiology Bureau, Department of Health, Philippines

18 <sup>6</sup> Disease Prevention and Control Bureau, Department of Health, Philippines

19 <sup>7</sup> Inter-Agency Task Force on Emerging Infectious Diseases (IATF) Task Force on COVID-19 Variants,  
20 Department of Health, Philippines

21 **ABSTRACT**

22 We report the sequencing and detection of 39 Severe Acute Respiratory Syndrome Coronavirus 2 (SARS-  
23 CoV-2) infections in the Philippines identified to be caused by viruses under the B.1.1.7 lineage (UK  
24 variant). Genome sequences obtained from these samples carry the lineage-defining mutations  
25 associated with the said variant of concern.

26

27 **ANNOUNCEMENT**

28 In this study, we present the genome sequences of 39 cases of Severe Acute Respiratory Syndrome  
29 Coronavirus 2 (SARS-CoV-2) infections in the Philippines that were found to be caused by lineage B.1.1.7  
30 viruses, more commonly known as the UK variant. This particular virus variant was initially identified in  
31 the United Kingdom and has been reported to cause a surge of SARS-CoV-2 infections in the said country  
32 (Kirby, 2021). Initial studies also suggest that the B.1.1.7 viruses appear to have replicative advantage  
33 (Grabowski et al., 2021) and are more transmissible (Leung et al., 2021).

34

35 **Table 1** shows the primary consensus assembly metrics for these samples. The average depth of coverage  
36 across all the sequences is 1,128x, with 33 of the samples carrying all 17 hallmark mutations of the B.1.1.7  
37 lineage (**Figure 1**) as listed in the PANGO Lineages report for the B.1.1.7 variant of concern ([https://cov-  
38 lineages.org/global\\_report\\_B.1.1.7.html](https://cov-lineages.org/global_report_B.1.1.7.html)).

39

40 The detection of B.1.1.7 from returning overseas Filipino workers and in the community highlights the  
41 need for genomic surveillance at the country's ports of entry and the general population to monitor the  
42 importation and local transmission of emerging variants of concern that may impact the public health  
43 response to the SARS-CoV-2 pandemic in the Philippines.

44

45

## 46 **METHODS**

47 In order to detect the entry of B.1.1.7 infection in the Philippines, nasopharyngeal swabs were collected  
48 between December 10, 2020 to January 31, 2021 from returning overseas Filipinos testing positive for  
49 SARS-CoV-2, as well as from local case clusters mainly from the Cordillera Administrative Region of the  
50 country, among others. The collected swab samples were then subjected to RNA extraction followed by  
51 genome sequencing, which was done using the Illumina COVIDSeq workflow. Afterwards, the resulting  
52 sequence reads were mapped to the reference SARS-CoV-2 genome (NCBI Accession Number  
53 [NC\\_045512.2](#)) using Minimap2 (Li, 2018) version 2.17-r941, with the `–x sr` parameter for short accurate  
54 genomic reads alignment.

55

56 Primer clipping and quality trimming, intrahost variant calling, removal of reads associated with  
57 mismatched primer indices, and consensus sequence assembly were all done following the suggested  
58 workflow of iVar (Grubaugh et al., 2019) version 1.2.2, using default parameters. The consensus variants  
59 were identified by comparing the resulting assemblies with the reference sequence using MUMmer (Kurtz  
60 et al., 2004) as implemented in the RATT software (Otto et al., 2011). SARS-CoV-2 lineage classifications  
61 were also assigned to the local viral samples using Pangolin version 2.3.2 ([github.com/cov-](https://github.com/cov-lineages/pangolin)  
62 [lineages/pangolin](https://github.com/cov-lineages/pangolin); Rambaut et al., 2020).

63

64

## 65 **PUBLIC AVAILABILITY AND ACCESSION NUMBERS**

66 The consensus sequence assemblies reported in this study are deposited in the [EpiCoV™ database of the](#)  
67 [GISAID](#). The accession codes are shown in **Table 1**.

68

69

70 **ACKNOWLEDGEMENT**

71 This project was supported by a Genomics Biosurveillance grant from the Philippine Department of  
72 Health, and a Department of Science and Technology – Philippine Council for Health Research and  
73 Development grant to BM and the University of the Philippines.

74

75

76 **ETHICS APPROVAL**

77 The protocols used in this study were reviewed and approved by the Single Joint Research Ethics Board of  
78 the Department of Health, with approval code SJREB-2021-11, as part of a larger research program  
79 entitled “A retrospective study on the national genomic surveillance of COVID-19 transmission in the  
80 Philippines by SARS-CoV-2 genome sequencing and bioinformatics analysis”.

81 **REFERENCES**

- 82 Grabowski F., Preibisch G., Kochanczyk M., and Lipniacki T. (2021). SARS-CoV-2 Variant Under  
83 Investigation 202012/01 has more than twofold replicative advantage. medRxiv.  
84 DOI: <https://doi.org/10.1101/2020.12.28.20248906>.
- 85 Grubaugh N., Gangavarapu K., Quick J., et al. (2019). An amplicon-based sequencing framework for  
86 accurately measuring intrahost virus diversity using PrimalSeq and iVar. *Genome Biology*. 20(8).  
87 DOI: <https://doi.org/10.1186/s13059-018-1618-7>.
- 88 Kirby T. (2021). New variant of SARS-COV-2 in UK causes surge of COVID-19. *Lancet Respiratory Medicine*.  
89 DOI: [https://doi.org/10.1016/S2213-2600\(21\)00005-9](https://doi.org/10.1016/S2213-2600(21)00005-9).
- 90 Kurtz S., Phillippy A., Delcher A., Smoot M., Shumway M., Antonescu C., and Salzberg S. (2004). Versatile  
91 and open software for comparing large genomes. *Genome Biology*. 5:R12.
- 92 Leung K., Shum M., Leung G., Lam T., and Wu J. (2021). Early transmissibility assessment of the N501Y  
93 mutant strains of SARS-CoV-2 in the United Kingdom, October to November 2020. *EuroSurveillance*.  
94 26(1):pii=2002106. DOI: <https://doi.org/10.2807/1560-7917.ES.2020.26.1.2002106>.
- 95 Li H. (2018). Minimap2: pairwise alignment for nucleotide sequences. *Bioinformatics*. 34:3094-3100.  
96 doi:10.1093/bioinformatics/bty191.
- 97 Otto T., Dillon G., Degraeve W., and Berriman M. (2011). RATT: rapid annotation transfer tool. *Nucleic Acids  
98 Research*. 39(9):e57. DOI: <https://doi.org/10.1093/nar/gkq1268>.
- 99 Rambaut, A., Holmes, E.C., O'Toole, Á. et al. (2020). A dynamic nomenclature proposal for SARS-CoV-2  
100 lineages to assist genomic epidemiology. *Nature Microbiology*. 5:1403–140.  
101 DOI: <https://doi.org/10.1038/s41564-020-0770-5>.
- 102 Shu, Y., and McCauley, J. (2017). GISAID: Global initiative on sharing all influenza data – from vision to  
103 reality. *EuroSurveillance*. 22(13). DOI:10.2807/1560-7917.ES.2017.22.13.30494.

**Table 1. Primary consensus sequence assembly metrics.**

| Sample Code  | GISAID Accession Code           | Collection Date | Sample Source | Mean Coverage Depth | # Consensus SNPs | # B.1.1.7 SNPs | % N   | Length |
|--------------|---------------------------------|-----------------|---------------|---------------------|------------------|----------------|-------|--------|
| PH-PGC-00315 | <a href="#">EPI_ISL_1081793</a> | 29-Dec-20       | ROF           | 1,201.27            | 52               | 17             | 1.76  | 29,884 |
| PH-PGC-00317 | <a href="#">EPI_ISL_1081794</a> | 29-Dec-20       | ROF           | 1,194.12            | 50               | 17             | 1.30  | 29,884 |
| PH-PGC-00401 | <a href="#">EPI_ISL_1081795</a> | 10-Dec-20       | ROF           | 996.07              | 51               | 17             | 2.12  | 29,884 |
| PH-PGC-00986 | <a href="#">EPI_ISL_1081796</a> | 7-Jan-21        | ROF           | 1,164.12            | 50               | 17             | 2.26  | 29,884 |
| PH-PGC-02005 | <a href="#">EPI_ISL_1081797</a> | 4-Jan-21        | CAR           | 508.19              | 44               | 14             | 16.82 | 29,884 |
| PH-PGC-02008 | <a href="#">EPI_ISL_1081798</a> | 3-Jan-21        | CAR           | 740.89              | 48               | 17             | 6.87  | 29,884 |
| PH-PGC-02009 | <a href="#">EPI_ISL_1081799</a> | 3-Jan-21        | CAR           | 689.44              | 45               | 14             | 10.19 | 29,884 |
| PH-PGC-02033 | <a href="#">EPI_ISL_1081800</a> | 5-Jan-21        | CAR           | 1,362.04            | 49               | 17             | 1.52  | 29,884 |
| PH-PGC-02127 | <a href="#">EPI_ISL_1081801</a> | 7-Jan-21        | CAR           | 973.77              | 45               | 14             | 11.36 | 29,884 |
| PH-PGC-02131 | <a href="#">EPI_ISL_1081802</a> | 7-Jan-21        | CAR           | 1,326.01            | 49               | 17             | 3.77  | 29,885 |
| PH-PGC-02133 | <a href="#">EPI_ISL_1081803</a> | 7-Jan-21        | CAR           | 892.30              | 49               | 16             | 10.20 | 29,884 |
| PH-PGC-02152 | <a href="#">EPI_ISL_1081804</a> | 9-Jan-21        | CAR           | 1,086.44            | 38               | 16             | 4.80  | 29,884 |
| PH-PGC-02181 | <a href="#">EPI_ISL_1081805</a> | 8-Jan-21        | CAR           | 882.19              | 50               | 17             | 4.18  | 29,884 |
| PH-PGC-02183 | <a href="#">EPI_ISL_1081806</a> | 8-Jan-21        | CAR           | 1,210.23            | 51               | 17             | 2.42  | 29,884 |
| PH-PGC-02184 | <a href="#">EPI_ISL_1081807</a> | 8-Jan-21        | CAR           | 891.29              | 48               | 16             | 7.54  | 29,884 |
| PH-PGC-02185 | <a href="#">EPI_ISL_1081808</a> | 8-Jan-21        | CAR           | 1,131.33            | 49               | 17             | 1.69  | 29,884 |
| PH-PGC-02225 | <a href="#">EPI_ISL_1081809</a> | 8-Jan-21        | CAR           | 1,303.29            | 51               | 17             | 2.14  | 29,884 |
| PH-PGC-02408 | <a href="#">EPI_ISL_1081810</a> | 7-Jan-21        | ROF           | 1,652.89            | 51               | 17             | 0.10  | 29,884 |
| PH-PGC-02434 | <a href="#">EPI_ISL_1081811</a> | 12-Jan-21       | ROF           | 1,168.26            | 53               | 17             | 0.78  | 29,884 |
| PH-PGC-02630 | <a href="#">EPI_ISL_1081812</a> | 16-Jan-21       | ROF           | 1,307.23            | 48               | 17             | 0.41  | 29,884 |
| PH-PGC-02725 | <a href="#">EPI_ISL_1081813</a> | 14-Jan-21       | ROF           | 1,140.03            | 52               | 17             | 2.04  | 29,884 |
| PH-PGC-02730 | <a href="#">EPI_ISL_1081814</a> | 16-Jan-21       | ROF           | 1,620.34            | 52               | 17             | 0.13  | 29,884 |

ROF – Returning Overseas Filipino

CAR – Cordillera Administrative Region

NCR – National Capital Region

NM –Northern Mindanao

| Sample Code  | GISAID Accession Code           | Collection Date | Sample Source | Mean Coverage Depth | # Consensus SNPs | # B.1.1.7 SNPs | % N   | Length |
|--------------|---------------------------------|-----------------|---------------|---------------------|------------------|----------------|-------|--------|
| PH-PGC-02732 | <a href="#">EPI_ISL_1081815</a> | 17-Jan-21       | ROF           | 724.58              | 52               | 17             | 0.25  | 29,884 |
| PH-PGC-02733 | <a href="#">EPI_ISL_1081816</a> | 17-Jan-21       | ROF           | 1,499.29            | 51               | 17             | 0.15  | 29,884 |
| PH-PGC-02740 | <a href="#">EPI_ISL_1081817</a> | 19-Jan-21       | ROF           | 769.66              | 30               | 12             | 14.07 | 29,894 |
| PH-PGC-02745 | <a href="#">EPI_ISL_1081818</a> | 19-Jan-21       | ROF           | 679.99              | 32               | 12             | 19.71 | 29,894 |
| PH-PGC-02756 | <a href="#">EPI_ISL_1081819</a> | 15-Jan-21       | CAR           | 1,037.94            | 50               | 17             | 2.23  | 29,884 |
| PH-PGC-02770 | <a href="#">EPI_ISL_1081820</a> | 15-Jan-21       | ROF           | 971.34              | 44               | 14             | 6.34  | 29,885 |
| PH-PGC-02793 | <a href="#">EPI_ISL_1081821</a> | 19-Jan-21       | ROF           | 1,290.90            | 50               | 17             | 0.90  | 29,884 |
| PH-PGC-02812 | <a href="#">EPI_ISL_1081822</a> | 24-Jan-21       | CAR           | 1,654.09            | 50               | 17             | 0.18  | 29,884 |
| PH-PGC-02826 | <a href="#">EPI_ISL_1081823</a> | 21-Jan-21       | CAR           | 1,346.54            | 52               | 17             | 0.31  | 29,884 |
| PH-PGC-02845 | <a href="#">EPI_ISL_1081824</a> | 13-Jan-21       | CAR           | 1,454.34            | 51               | 17             | 0.58  | 29,884 |
| PH-PGC-02851 | <a href="#">EPI_ISL_1081825</a> | 11-Jan-21       | CAR           | 1,563.14            | 49               | 17             | 0.28  | 29,884 |
| PH-PGC-02886 | <a href="#">EPI_ISL_1081826</a> | 16-Jan-21       | CAR           | 1,411.43            | 51               | 17             | 0.86  | 29,884 |
| PH-PGC-03690 | <a href="#">EPI_ISL_1081829</a> | 22-Dec-20       | Calabarzon    | 421.38              | 20               | 5              | 50.35 | 29,900 |
| PH-PGC-03846 | <a href="#">EPI_ISL_1081830</a> | 24-Jan-21       | ROF           | 1,458.88            | 49               | 17             | 0.16  | 29,884 |
| PH-PGC-03939 | <a href="#">EPI_ISL_1081831</a> | 31-Jan-21       | ROF           | 2,082.45            | 50               | 16             | 0.27  | 29,885 |
| PH-PGC-03978 | <a href="#">EPI_ISL_1081832</a> | 25-Jan-21       | NCR           | 990.68              | 53               | 16             | 2.01  | 29,884 |
| PH-PGC-03995 | <a href="#">EPI_ISL_1081841</a> | 25-Jan-21       | NM            | 206.76              | 22               | 7              | 37.77 | 29,896 |

ROF – Returning Overseas Filipino

CAR – Cordillera Administrative Region

NCR – National Capital Region

NM –Northern Mindanao

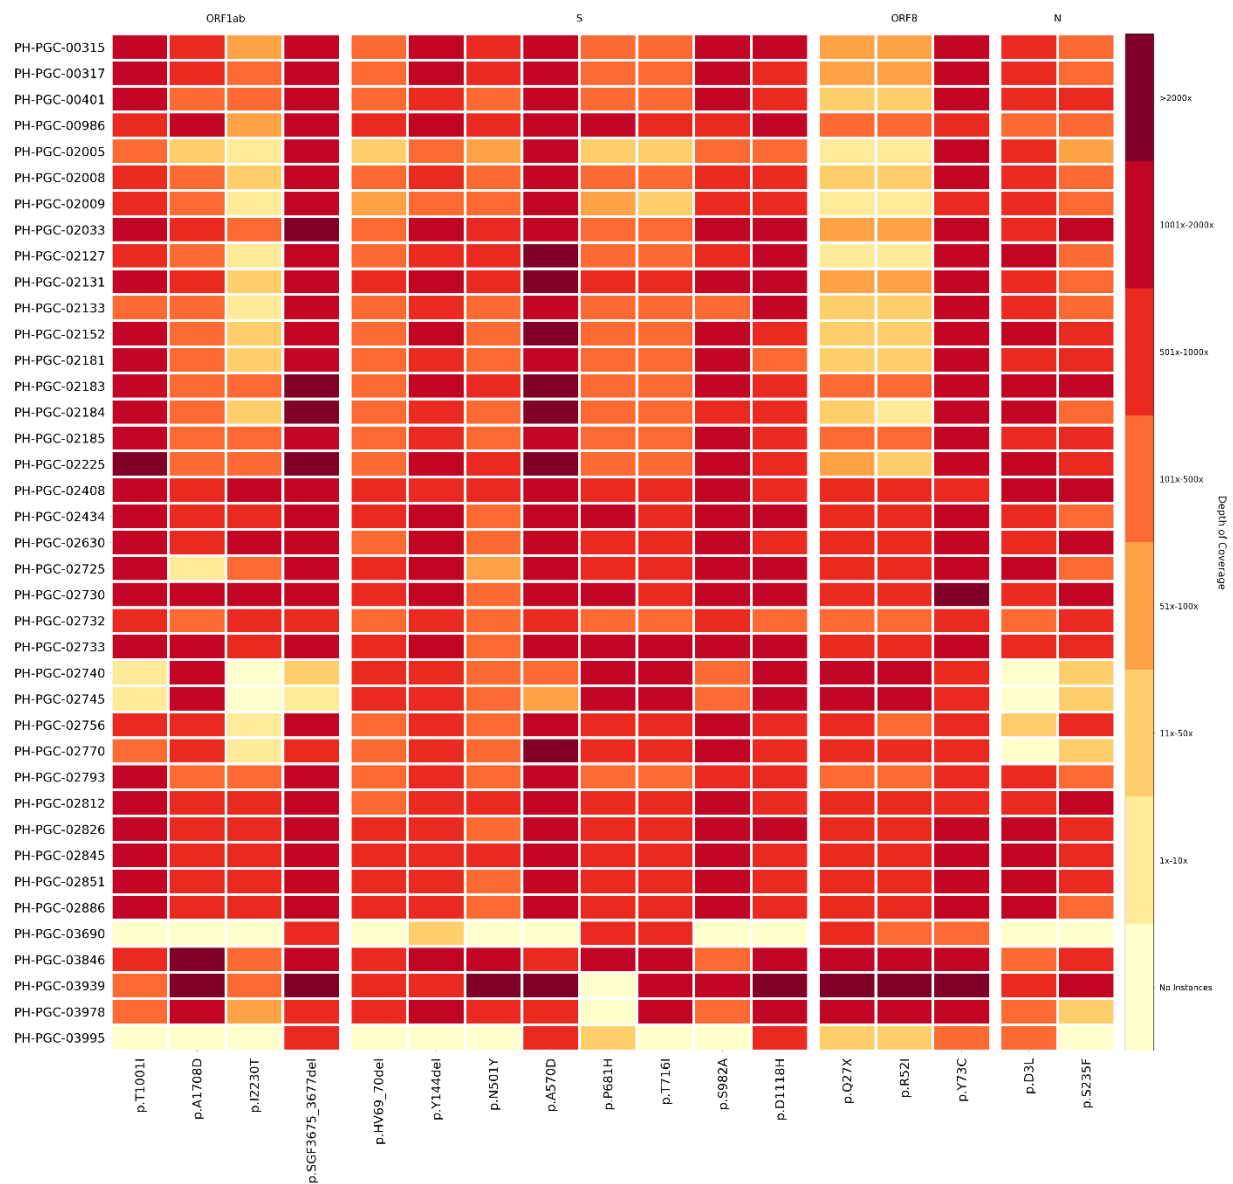

**Figure 1. Presence of B.1.1.7 lineage defining mutations in the Philippine SARS-CoV-2 samples.** Sequence read coverage for the 17 lineage defining mutations of the B.1.1.7 viruses are shown for each of the locally collected samples classified under the said viral lineage.
